# Supplementary material
Source: PubMed Central journal article supplement (PMC9812925)
Supplement: NIHMS1857148-supplement-3.pdf [file NIHMS1857148-supplement-3.pdf]

SUPPLEMENTARY FILES

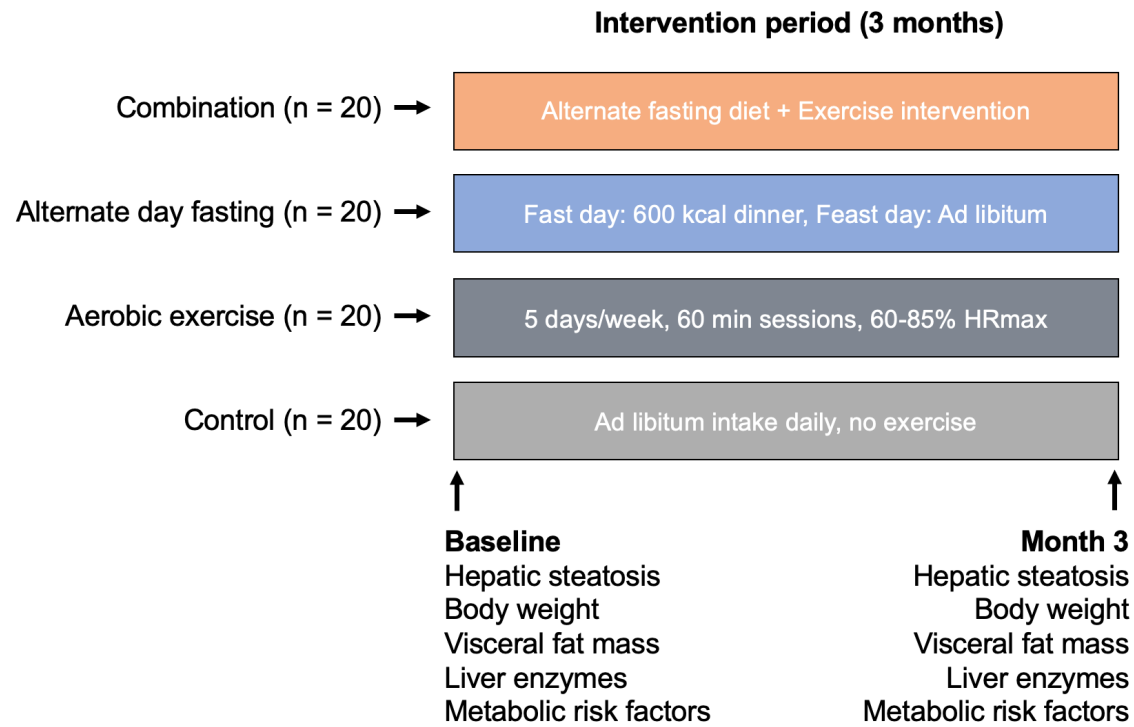

Figure S1. Intervention groups and experimental design, Related to Figure 1

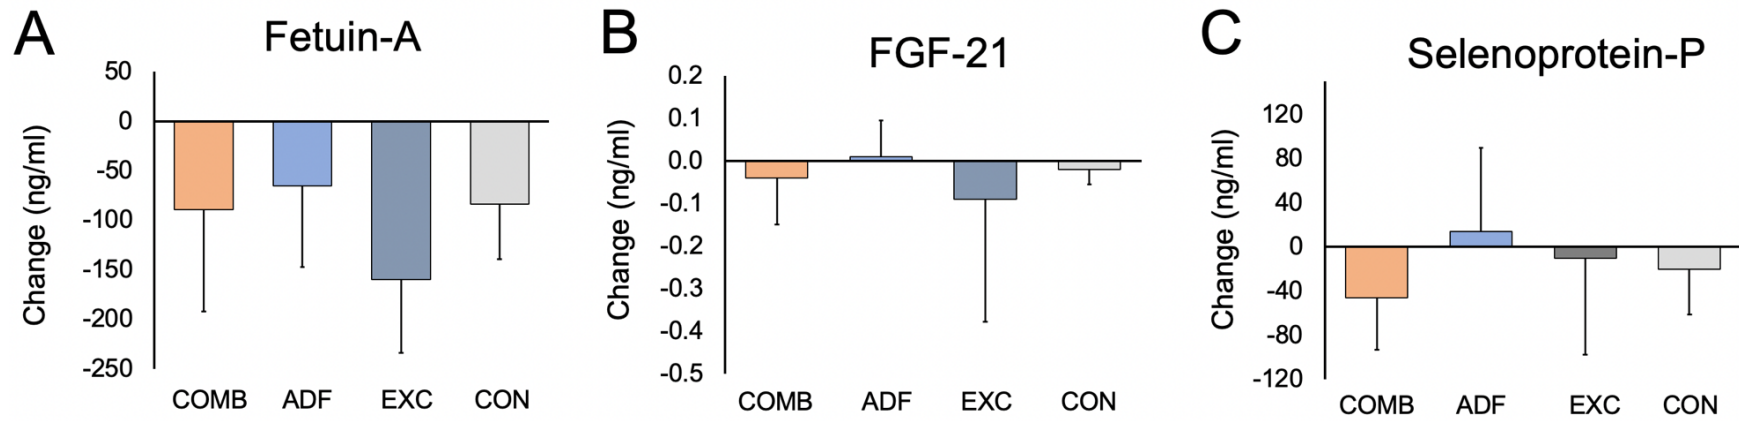

**Figure S2. Hepatokines, Related to Figure 2**

Data are expressed as mean (SD). No significant differences between groups for changes in fetuin-A, fibroblast growth factor-21 (FGF-21), or selenoprotein-P.

**Table S1. Relationship between hepatokines and metabolic disease risk factors, Related to Figure 2**

| Absolute changes               | IHTG (%) | ALT (U/L) | AST (U/L) | Body weight (kg) | Visceral fat (kg) | WC (cm) | Fasting glucose (mg/dl) | Fasting insulin (uIU/ml) | Insulin resistance (units) | Insulin sensitivity (units) | HbA1c (%)    |
|--------------------------------|----------|-----------|-----------|------------------|-------------------|---------|-------------------------|--------------------------|----------------------------|-----------------------------|--------------|
| <b>Fetuin-A (ng/ml)</b>        |          |           |           |                  |                   |         |                         |                          |                            |                             |              |
| R-value                        | 0.195    | 0.009     | -0.105    | -0.242           | 0.005             | 0.128   | <b>0.465</b>            | 0.080                    | 0.144                      | -0.229                      | <b>0.432</b> |
| P-value                        | 0.278    | 0.960     | 0.553     | 0.169            | 0.979             | 0.471   | <b>0.006</b>            | 0.660                    | 0.424                      | 0.200                       | <b>0.012</b> |
| <b>FGF-21 (ng/ml)</b>          |          |           |           |                  |                   |         |                         |                          |                            |                             |              |
| R-value                        | 0.035    | -0.090    | 0.062     | 0.052            | -0.007            | -0.142  | -0.005                  | -0.120                   | -0.115                     | 0.071                       | 0.053        |
| P-value                        | 0.817    | 0.540     | 0.672     | 0.722            | 0.961             | 0.329   | 0.973                   | 0.421                    | 0.441                      | 0.635                       | 0.725        |
| <b>Selenoprotein-P (ng/ml)</b> |          |           |           |                  |                   |         |                         |                          |                            |                             |              |
| R-value                        | 0.038    | -0.009    | -0.046    | 0.080            | 0.080             | 0.030   | -0.013                  | 0.092                    | 0.085                      | -0.034                      | 0.092        |
| P-value                        | 0.798    | 0.951     | 0.748     | 0.577            | 0.579             | 0.835   | 0.930                   | 0.529                    | 0.560                      | 0.816                       | 0.527        |

Pearson correlation coefficients for associations between absolute changes in hepatokines and metabolic disease risk factors. ALT: alanine transaminase; AST: aspartate transaminase; FGF-21: Fibroblast growth factor-21; IHTG: Intrahepatic triglyceride content; WC: Waist circumference. Insulin resistance measured by homeostatic model assessment of insulin resistance (HOMA-IR). Insulin sensitivity measured by quantitative insulin-sensitivity check index (QUICKI).
